# Supplementary material for: Lung function from school age to adulthood in primary ciliary dyskinesia
Source: PubMed Central journal article supplement — Eur Respir J. 2022 Oct 20;60(4):2101918. doi: 10.1183/13993003.01918-2021 (PMC9582507; doi:10.1183/13993003.01918-2021), 2022-10-20
Supplement: ERJ-01918-2021.Supplement.pdf [file ERJ-01918-2021.Supplement.pdf]

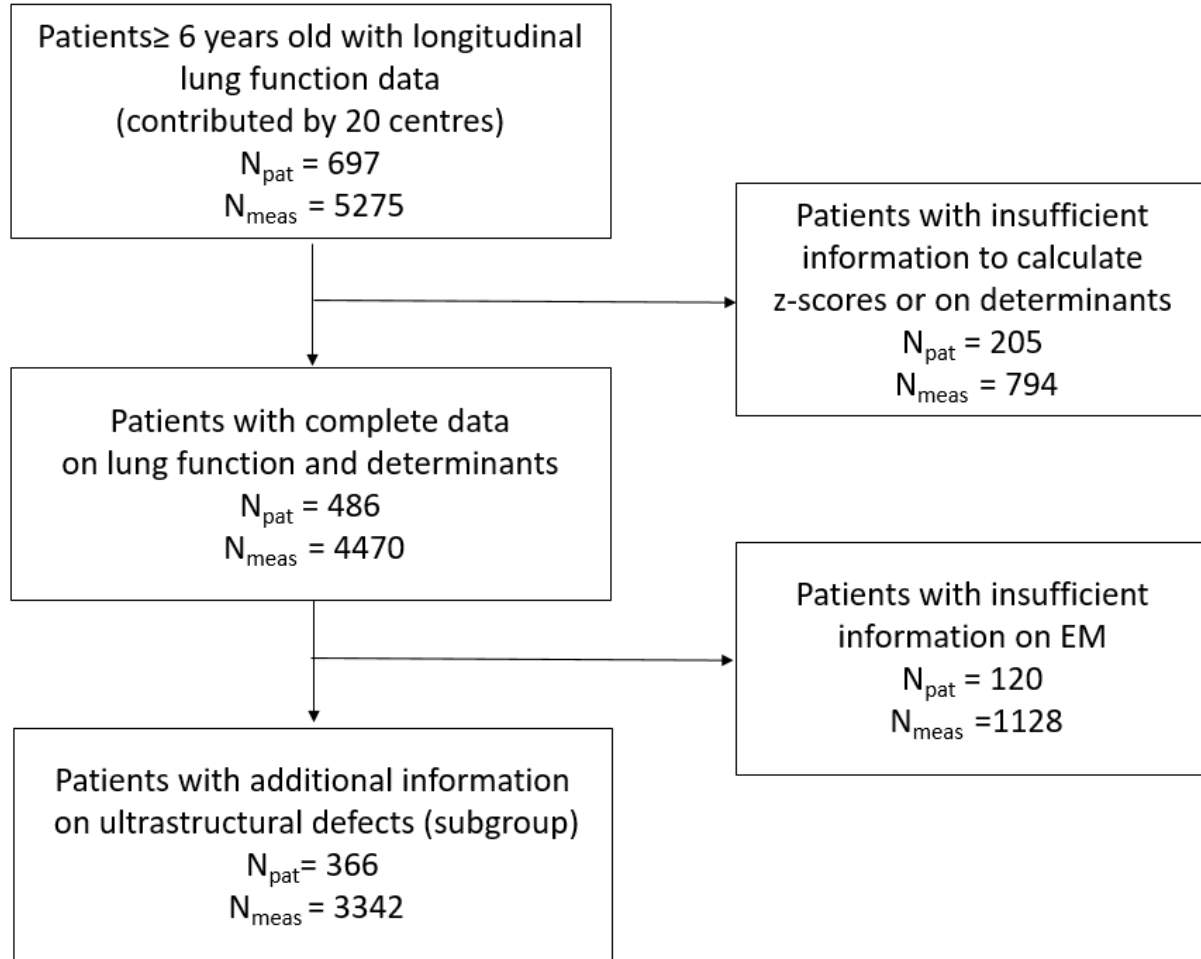

**Figure S1.** Flow chart showing the patients and respective lung function measurements included for the main analysis and the subgroup analysis.

N<sub>pat</sub>: number of patients; N<sub>meas</sub>: number of measurements; EM: electron microscopy

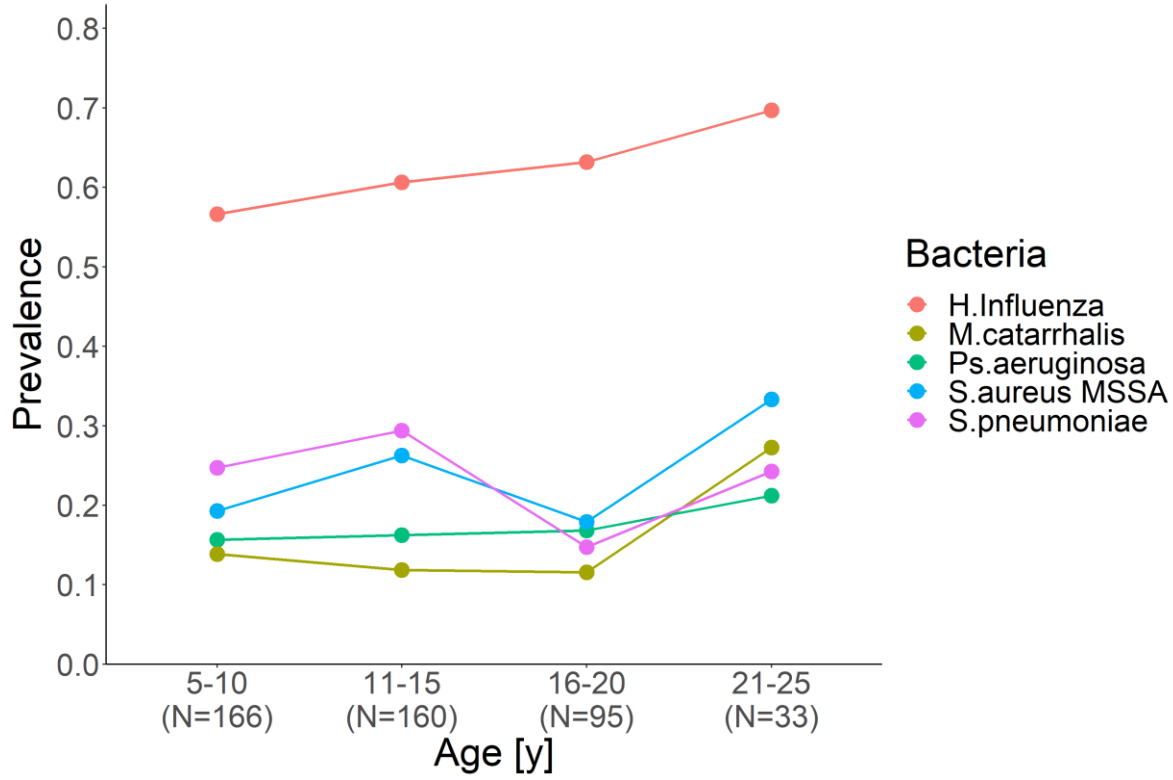

**Figure S2.** Cross-sectional prevalence of bacteria isolated from the respiratory tract in patients with primary ciliary dyskinesia (PCD) from the international PCD cohort.

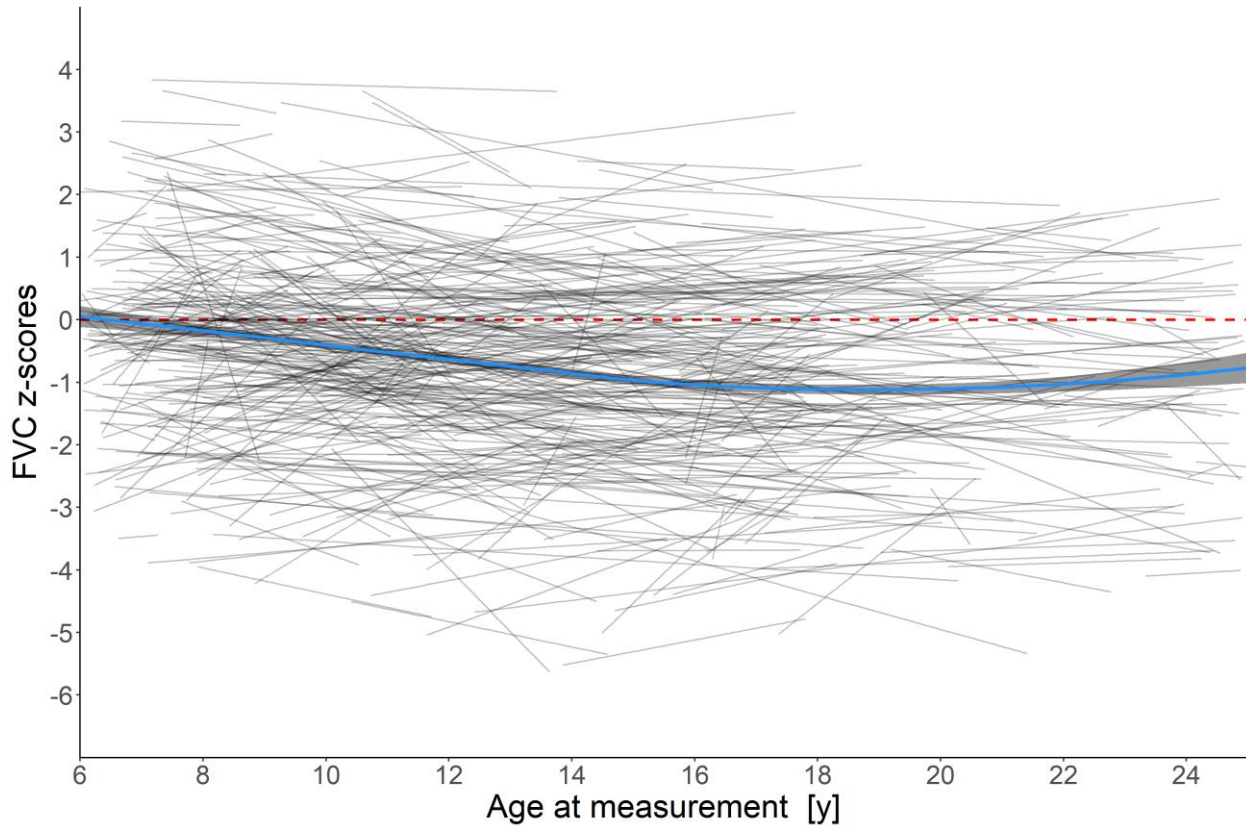

**Figure S3.** FVC trajectories during the lung growth period compared to Global Lung Function Initiative 2012 reference values.

FVC (Forced vital capacity) is presented as z-score. A loess curve (blue line) was used to display the trajectory over time of all measurements and is plotted with a 95% confidence interval (shaded bands). Grey lines represent the individual linear trajectories of each patient included in the study. The dashed line shows the mean z-score of the normal population

**Table S1** FVC of patients with primary ciliary dyskinesia (PCD) from the international PCD cohort, compared to Global Lung Function Initiative 2012 reference values (linear mixed effects regression, adjusting for all covariates).

| Variable                                                                             | Estimate | FVC    |       | p-value <sup>¶</sup> |
|--------------------------------------------------------------------------------------|----------|--------|-------|----------------------|
|                                                                                      |          | 95% CI |       |                      |
| <b>Intercept</b> (Lung function at age 6 years for “reference patient”) <sup>†</sup> | -1.10    | -2.07  | -0.13 |                      |
| <b>Age at measurement</b>                                                            | 0.02     | -0.07  | 0.11  |                      |
| <b>Country</b> (Ref: Germany)                                                        |          |        |       | <0.01                |
| Australia                                                                            | 0.06     | -0.90  | 1.02  |                      |
| Belgium                                                                              | 0.76     | -0.10  | 1.62  |                      |
| Cyprus                                                                               | -0.82    | -1.81  | 0.17  |                      |
| Czech Republic                                                                       | -0.73    | -1.49  | 0.03  |                      |
| Denmark                                                                              | 1.09     | 0.43   | 1.73  |                      |
| France                                                                               | 0.80     | -0.02  | 1.63  |                      |
| Greece                                                                               | 1.09     | -2.46  | 4.64  |                      |
| Israel                                                                               | 0.36     | -0.49  | 1.22  |                      |
| Italy                                                                                | 0.52     | -0.25  | 1.30  |                      |
| Netherlands                                                                          | 2.98     | 2.16   | 3.81  |                      |
| Norway                                                                               | 0.38     | -0.59  | 1.36  |                      |
| Poland                                                                               | -0.01    | -0.88  | 0.87  |                      |
| Switzerland                                                                          | 0.52     | -0.26  | 1.31  |                      |
| Turkey                                                                               | -1.78    | -2.51  | -1.05 |                      |
| UK                                                                                   | -0.20    | -1.05  | 0.65  |                      |
| <b>Sex</b> (Ref: male)                                                               |          |        |       | 0.79                 |
| Female                                                                               | -0.11    | -0.42  | 0.20  |                      |
| <b>Age at diagnosis</b>                                                              | -0.02    | -0.05  | 0.01  | 0.47                 |
| <b>Diagnostic period</b>                                                             | 0.01     | -0.02  | 0.04  | 0.49                 |
| <b>Diagnostic certainty</b> (Ref: definite PCD diagnosis)                            |          |        |       | 0.30                 |
| Probable PCD diagnosis                                                               | -0.12    | -0.52  | 0.29  |                      |
| Clinical diagnosis only                                                              | 0.33     | -0.35  | 1.01  |                      |
| <b>Laterality defects</b> (Ref: Situs solitus)                                       |          |        |       | 0.40                 |
| Situs Ambiguous                                                                      | 0.16     | -0.83  | 1.15  |                      |
| Situs Inversus                                                                       | 0.30     | -0.05  | 0.64  |                      |
| Situs Unknown                                                                        | 0.00     | -0.74  | 0.72  |                      |
| <b>BMI</b>                                                                           | 0.40     | 0.35   | 0.45  | <0.01                |
| <b>Change of lung function over time</b>                                             |          |        |       |                      |
| <b>Country</b> (Ref: Germany)                                                        |          |        |       | <0.01                |
| Australia                                                                            | -0.05    | -0.13  | 0.04  |                      |
| Belgium                                                                              | -0.10    | -0.18  | -0.02 |                      |
| Cyprus                                                                               | -0.04    | -0.12  | 0.05  |                      |
| Czech Republic                                                                       | -0.02    | -0.09  | 0.06  |                      |
| Denmark                                                                              | -0.05    | -0.12  | 0.01  |                      |
| France                                                                               | -0.10    | -0.18  | -0.03 |                      |
| Greece                                                                               | -0.08    | -0.41  | 0.25  |                      |
| Israel                                                                               | -0.09    | -0.17  | -0.01 |                      |
| Italy                                                                                | -0.09    | -0.17  | -0.02 |                      |
| Netherlands                                                                          | -0.26    | -0.37  | -0.16 |                      |
| Norway                                                                               | -0.07    | -0.18  | 0.04  |                      |
| Poland                                                                               | -0.04    | -0.14  | 0.06  |                      |

|                                                           |        |        |       |      |
|-----------------------------------------------------------|--------|--------|-------|------|
| Switzerland                                               | -0.06  | -0.14  | 0.02  |      |
| Turkey                                                    | 0.08   | 0.01   | 0.16  |      |
| UK                                                        | -0.05  | -0.13  | 0.04  |      |
| <b>Sex</b> (Ref: male)                                    |        |        |       | 0.61 |
| Female                                                    | 0.01   | -0.02  | 0.04  |      |
| <b>Age at diagnosis</b>                                   | 0.002  | -0.001 | 0.005 | 0.24 |
| <b>Diagnostic period</b>                                  | -2.12  | -0.003 | 0.003 | 0.99 |
| <b>Diagnostic certainty</b> (Ref: definite PCD diagnosis) |        |        |       | 0.21 |
| Probable PCD diagnosis                                    | -0.01  | -0.05  | 0.03  |      |
| Clinical diagnosis only                                   | -0.07  | -0.14  | 0.01  |      |
| <b>Laterality defects</b> (Ref: situs solitus)            |        |        |       | 0.73 |
| Situs Ambiguous                                           | -0.004 | -0.10  | 0.09  |      |
| Situs Inversus                                            | -0.01  | -0.04  | 0.02  |      |
| Situs Unknown                                             | -0.04  | -0.10  | 0.03  |      |
| <b>BMI</b>                                                | 0.01   | -0.005 | 0.02  | 0.01 |

FVC: Forced vital capacity; BMI: body mass index

<sup>¶</sup> Likelihood ratio test p-value indicating whether the characteristic explains differences in FVC within the study population.

<sup>†</sup> The Intercept describes the FVC of a reference patient at 6 years, who is male, from Germany, with a BMI z-score of 0, diagnosed at age 6 years in 1978, with a definite PCD diagnosis. Categorical variables describe the change from the reference category, while continuous variables describe the change from the reference patient for each unit of increase. \* Defined as hallmark PCD ultrastructural defect identified by electron microscopy findings or biallelic PCD causing gene mutation based on the ERS PCD diagnosis guidelines [14]. <sup>#</sup> Abnormal light or high frequency video microscopy finding and/or low ( $\leq 77$ nl/min) nasal NO value. Change of lung function over time describes the change in the trajectory of FEV<sub>1</sub> per year increase, based on the reference category for categorical variables and for each unit of increase for continuous variables.

**Table S2** FEV<sub>1</sub>/FVC of patients with primary ciliary dyskinesia (PCD) from the international PCD cohort, compared to Global Lung Function Initiative 2012 reference values (linear mixed effects regression, adjusting for all covariates).

| Variable                                                                                     | Estimate | FEV/FVC |       | p-value <sup>¶</sup> |
|----------------------------------------------------------------------------------------------|----------|---------|-------|----------------------|
|                                                                                              |          | 95% CI  |       |                      |
| <b>Intercept</b> (FEV <sub>1</sub> /FVC at age 6 years for “reference patient”) <sup>+</sup> | -0.36    | -1.28   | 0.56  |                      |
| <b>Age at measurement</b>                                                                    | -0.09    | -0.18   | 0.01  |                      |
| <b>Country</b> (Ref: Germany)                                                                |          |         |       | <0.01                |
| Australia                                                                                    | -0.70    | -1.61   | 0.20  |                      |
| Belgium                                                                                      | -1.75    | -2.58   | -0.93 |                      |
| Cyprus                                                                                       | -0.51    | -1.45   | 0.42  |                      |
| Czech Republic                                                                               | -0.40    | -1.12   | 0.31  |                      |
| Denmark                                                                                      | -1.25    | -1.86   | -0.63 |                      |
| France                                                                                       | -1.16    | -1.95   | -0.38 |                      |
| Greece                                                                                       | -0.07    | -3.45   | 3.31  |                      |
| Israel                                                                                       | -0.50    | -1.31   | 0.31  |                      |
| Italy                                                                                        | -1.32    | -2.06   | 0.31  |                      |
| Netherlands                                                                                  | -1.88    | -2.65   | -1.11 |                      |
| Norway                                                                                       | -1.16    | -2.09   | -0.24 |                      |
| Poland                                                                                       | -1.59    | -2.42   | -0.76 |                      |
| Switzerland                                                                                  | -0.42    | -1.16   | 0.33  |                      |
| Turkey                                                                                       | -0.39    | -1.09   | 0.30  |                      |
| UK                                                                                           | -1.60    | -2.42   | -0.77 |                      |
| <b>Sex</b> (Ref: male)                                                                       |          |         |       | 0.06                 |
| Female                                                                                       | -0.05    | -0.35   | 0.24  |                      |
| <b>Age at diagnosis</b>                                                                      | -0.001   | -0.01   | 0.03  | 0.01                 |
| <b>Diagnostic period</b>                                                                     | 0.02     | -0.01   | 0.05  | 0.04                 |
| <b>Diagnostic certainty</b> (Ref: definite PCD diagnosis)                                    |          |         |       | 0.02                 |
| Probable PCD diagnosis                                                                       | 0.17     | -0.22   | 0.56  |                      |
| Clinical diagnosis only                                                                      | 0.21     | -0.45   | 0.88  |                      |
| <b>Laterality defects</b> (Ref: Situs solitus)                                               |          |         |       | 0.70                 |
| Situs Ambiguous                                                                              | -0.19    | -1.18   | 0.81  |                      |
| Situs Inversus                                                                               | 0.08     | -0.25   | 0.40  |                      |
| Situs Unknown                                                                                | -0.01    | -0.73   | 0.70  |                      |
| <b>BMI</b>                                                                                   | -0.04    | -0.08   | 0.01  | 0.20                 |
| <b>Change of lung function over time</b>                                                     |          |         |       |                      |
| <b>Country</b> (Ref: Germany)                                                                |          |         |       | <0.01                |
| Australia                                                                                    | 0.04     | -0.05   | 0.13  |                      |
| Belgium                                                                                      | 0.21     | -0.12   | 0.26  |                      |
| Cyprus                                                                                       | 0.16     | 0.07    | 0.26  |                      |
| Czech Republic                                                                               | 0.09     | 0.01    | 0.17  |                      |
| Denmark                                                                                      | 0.05     | -0.02   | 0.12  |                      |
| France                                                                                       | 0.11     | 0.02    | 0.19  |                      |
| Greece                                                                                       | 0.17     | -0.16   | 0.50  |                      |
| Israel                                                                                       | 0.08     | -0.01   | 0.16  |                      |
| Italy                                                                                        | 0.11     | 0.04    | 0.19  |                      |
| Netherlands                                                                                  | 0.18     | 0.07    | 0.22  |                      |
| Norway                                                                                       | 0.10     | -0.01   | 0.22  |                      |
| Poland                                                                                       | 0.16     | 0.06    | 0.26  |                      |

|                                                           |        |       |        |      |
|-----------------------------------------------------------|--------|-------|--------|------|
| Switzerland                                               | 0.03   | -0.05 | 0.11   |      |
| Turkey                                                    | 0.06   | -0.01 | 0.14   |      |
| UK                                                        | 0.10   | 0.02  | 0.19   |      |
| <b>Sex (Ref: male)</b>                                    |        |       |        | 0.17 |
| Female                                                    | -0.02  | -0.05 | 0.01   |      |
| <b>Age at diagnosis</b>                                   | 0.004  | 0.001 | 0.01   | 0.02 |
| <b>Diagnostic period</b>                                  | -0.004 | -0.01 | -0.001 | 0.01 |
| <b>Diagnostic certainty (Ref: definite PCD diagnosis)</b> |        |       |        | 0.20 |
| Probable PCD diagnosis                                    | -0.001 | -0.04 | 0.04   |      |
| Clinical diagnosis only                                   | 0.07   | -0.01 | 0.15   |      |
| <b>Laterality defects (Ref: situs solitus)</b>            |        |       |        | 0.41 |
| Situs Ambiguous                                           | 0.05   | -0.06 | 0.15   |      |
| Situs Inversus                                            | -0.02  | -0.06 | 0.01   |      |
| Situs Unknown                                             | -0.01  | -0.09 | 0.06   |      |
| <b>BMI</b>                                                | 0.01   | -0.01 | 0.02   | 0.17 |

FEV<sub>1</sub>: Forced expiratory volume in 1 second; FVC: Forced vital capacity; BMI: body mass index

<sup>¶</sup> Likelihood ratio test p-value indicating whether the characteristic explains differences in FEV<sub>1</sub>/FVC within the study population.

<sup>†</sup> The Intercept describes the FEV<sub>1</sub>/FVC of a reference patient at 6 years, who is male, from Germany, with a BMI z-score of 0, diagnosed at age 6 years in 1978, with a definite PCD diagnosis. Categorical variables describe the change from the reference category, while continuous variables describe the change from the reference patient for each unit of increase. \* Defined as hallmark PCD ultrastructural defect identified by electron microscopy findings or biallelic PCD causing gene mutation based on the ERS PCD diagnosis guidelines [14]. <sup>#</sup> Abnormal light or high frequency video microscopy finding and/or low ( $\leq 77$ nl/min) nasal NO value.

Change of lung function over time describes the change in the trajectory of FEV<sub>1</sub>/FVC per year increase, based on the reference category for categorical variables and for each unit of increase for continuous variables.

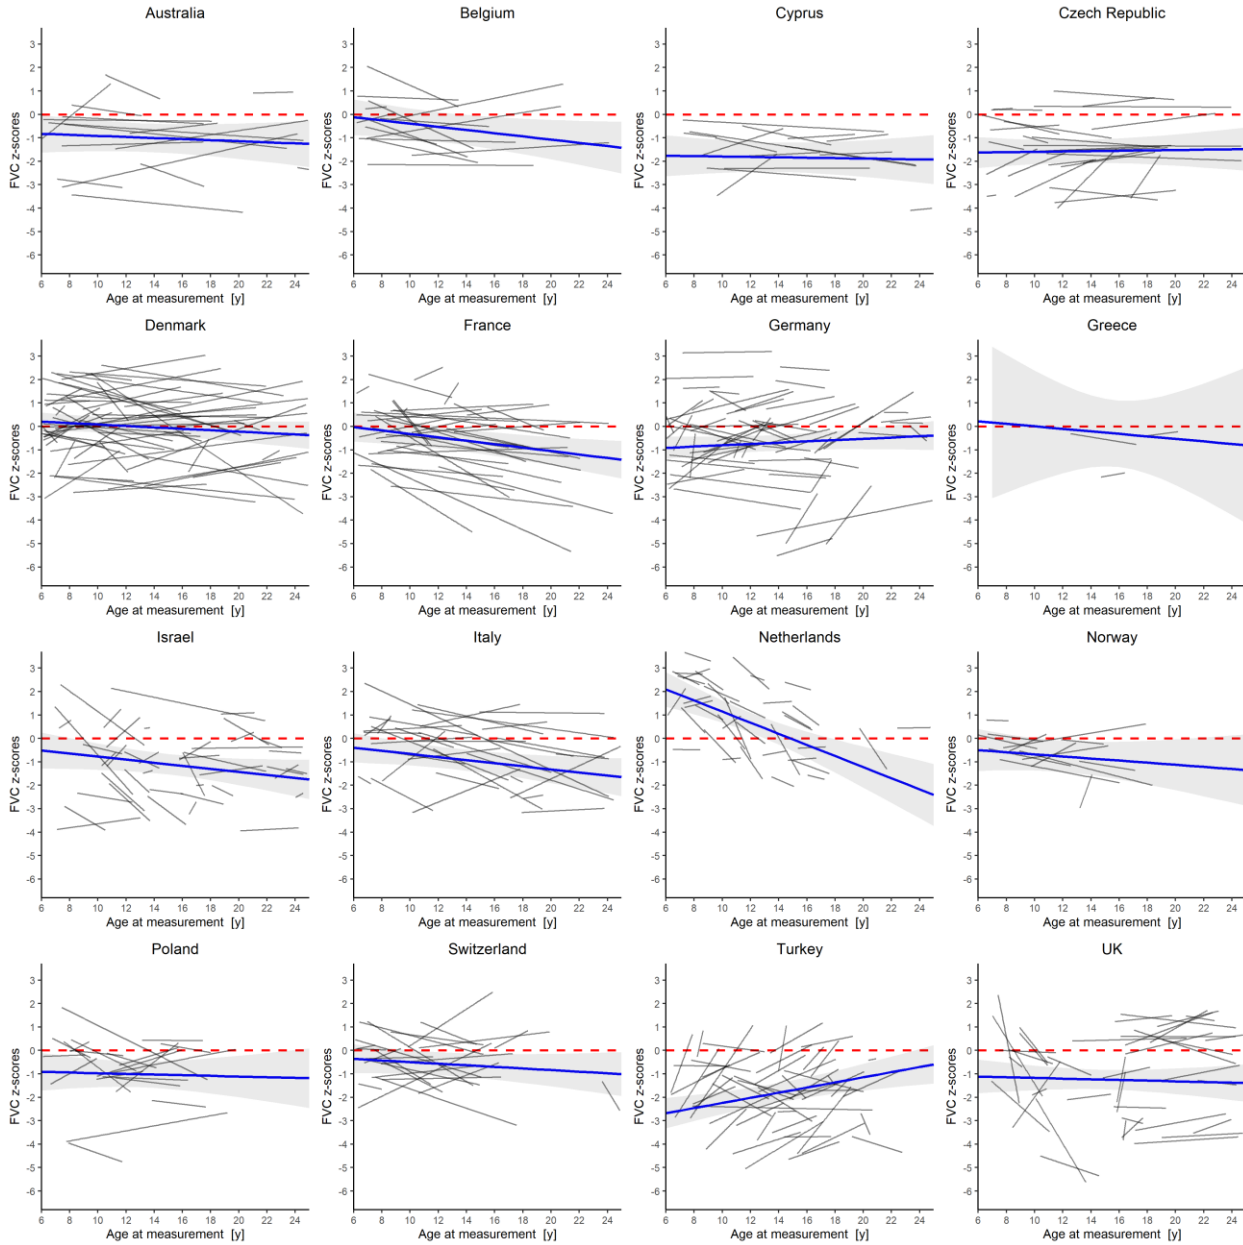

**Figure S4.** FVC trajectories of PCD patients in different countries compared to Global Lung Function Initiative (GLI) 2012 reference values.

Individual trajectories are shown as black lines, marginal effects (estimated regression line for subgroup) as blue lines, 95% confidence intervals as grey shaded areas. The dashed line shows the mean z-score of the normal population (GLI 2012). FVC: Forced vital capacity



**Table S3.** FEV<sub>1</sub> and FVC of patients with primary ciliary dyskinesia (PCD) from the international PCD cohort with available ultrastructural defect information compared to Global Lung Function Initiative 2012 reference values (N = 366).

| Variable                                                                  | FEV <sub>1</sub> |        |         | FVC      |        |         |       |
|---------------------------------------------------------------------------|------------------|--------|---------|----------|--------|---------|-------|
|                                                                           | Estimate         | 95% CI | p-value | Estimate | 95% CI | p-value |       |
| <b>Intercept</b> (Lung function at age 6 years for “reference patient”) + | -1.27            | -2.41  | -0.13   | -0.35    | -1.54  | 0.83    |       |
| <b>Age at measurement</b>                                                 | -0.02            | -0.12  | 0.08    | -0.08    | -0.18  | 0.03    |       |
| <b>Country</b> (Ref: Germany)                                             |                  |        |         |          |        |         | <0.01 |
| Australia                                                                 | -0.29            | -1.30  | 0.71    | -0.20    | -1.24  | 0.84    |       |
| Belgium                                                                   | -0.02            | -0.92  | 0.87    | 0.66     | -0.27  | 1.58    |       |
| Cyprus                                                                    | -1.40            | -2.36  | -0.44   | -1.14    | -2.14  | -0.14   |       |
| Czech Republic                                                            | -1.02            | -1.80  | -0.23   | -0.90    | -1.71  | -0.09   |       |
| Denmark                                                                   | 0.53             | -0.20  | 1.26    | 1.03     | 0.27   | 1.78    |       |
| France                                                                    | 0.74             | -0.22  | 1.70    | 1.04     | 0.04   | 2.04    |       |
| Israel                                                                    | 0.63             | -0.32  | 1.58    | 0.69     | -0.29  | 1.68    |       |
| Italy                                                                     | -0.43            | -1.26  | 0.40    | 0.34     | -0.52  | 1.21    |       |
| Netherlands                                                               | 1.71             | 0.74   | 2.68    | 2.78     | 1.78   | 3.78    |       |
| Norway                                                                    | -0.20            | -1.20  | 0.81    | 0.27     | -0.77  | 1.31    |       |
| Poland                                                                    | -1.01            | -2.04  | 0.02    | -0.32    | -1.40  | 0.75    |       |
| Switzerland                                                               | 0.07             | -0.79  | 0.93    | 0.07     | -0.82  | 0.97    |       |
| Turkey                                                                    | -1.04            | -2.27  | 0.19    | -1.24    | -2.52  | 0.03    |       |
| UK                                                                        | -1.02            | -1.96  | -0.08   | -0.57    | -1.55  | 0.40    |       |
| <b>Sex</b> (Ref: male)                                                    |                  |        |         |          |        |         | 0.08  |
| Female                                                                    | -0.05            | -0.39  | 0.30    | -0.28    | -0.63  | 0.08    | 0.30  |
| <b>Age at diagnosis</b>                                                   | -0.01            | -0.04  | 0.03    | -0.004   | -0.04  | 0.03    | 0.15  |
| <b>Diagnostic period</b>                                                  | 0.02             | -0.01  | 0.05    | -0.01    | -0.04  | 0.03    | 0.57  |
| <b>Laterality defects</b> (Ref: Situs solitus)                            |                  |        |         |          |        |         | 0.81  |
| Situs Ambiguous                                                           | 0.25             | -0.71  | 1.20    | 0.13     | -0.86  | 1.12    |       |
| Situs Inversus                                                            | 0.14             | -0.25  | 0.53    | 0.04     | -0.37  | 0.45    |       |
| Situs Unknown                                                             | -0.41            | -1.23  | 0.41    | -0.50    | -1.35  | 0.36    |       |
| <b>Ultrastructural defects</b> (Ref: ODA)                                 |                  |        |         |          |        |         | 0.01  |
| Central Complex defect                                                    | -0.11            | -0.67  | 0.45    | -0.36    | -0.94  | 0.22    |       |
| ODA/IDA                                                                   | 0.67             | 0.19   | 1.14    | 0.41     | -0.08  | 0.90    |       |
| Microtubular disorganisation                                              | -0.49            | -1.15  | 0.17    | -0.47    | -1.16  | 0.22    |       |
| Non-diagnostic                                                            | 0.36             | -0.20  | 0.91    | 0.10     | -0.48  | 0.68    |       |
| <b>BMI</b>                                                                | 0.34             | 0.29   | 0.39    | 0.43     | 0.37   | 0.48    | <0.01 |
| <b>Change of lung function over time</b>                                  |                  |        |         |          |        |         |       |
| <b>Country</b> (Ref: Germany)                                             |                  |        |         |          |        |         | <0.01 |
| Australia                                                                 | -0.03            | -0.12  | 0.05    | -0.02    | -0.11  | 0.07    |       |
| Belgium                                                                   | -0.01            | -0.09  | 0.07    | -0.07    | -0.15  | 0.02    |       |
| Cyprus                                                                    | 0.05             | -0.03  | 0.14    | -0.02    | -0.11  | 0.07    |       |
| Czech Republic                                                            | 0.02             | -0.05  | 0.10    | -0.004   | -0.08  | 0.07    |       |
| Denmark                                                                   | -0.05            | -0.12  | 0.02    | -0.05    | -0.12  | 0.02    |       |
| France                                                                    | -0.10            | -0.19  | -0.02   | -0.12    | -0.21  | -0.03   |       |
| Israel                                                                    | -0.11            | -0.20  | -0.02   | -0.11    | -0.20  | -0.01   |       |
| Italy                                                                     | -0.06            | -0.13  | 0.02    | -0.08    | -0.16  | -0.004  |       |

|                                                |        |        |       |       |       |        |       |      |
|------------------------------------------------|--------|--------|-------|-------|-------|--------|-------|------|
| Netherlands                                    | -0.17  | -0.31  | -0.03 |       | -0.24 | -0.38  | -0.10 |      |
| Norway                                         | -0.04  | -0.15  | 0.06  |       | -0.07 | -0.19  | 0.04  |      |
| Poland                                         | 0.06   | -0.06  | 0.17  |       | -0.04 | -0.16  | 0.09  |      |
| Switzerland                                    | -0.02  | -0.10  | 0.07  |       | 0.01  | -0.07  | 0.10  |      |
| Turkey                                         | 0.01   | -0.11  | 0.12  |       | 0.01  | -0.11  | 0.13  |      |
| UK                                             | 0.01   | -0.08  | 0.10  |       | -0.01 | -0.10  | 0.08  |      |
| <b>Sex (ref: male)</b>                         |        |        |       | 0.11  |       |        |       | 0.20 |
| Female                                         | -0.03  | -0.06  | 0.01  |       | 0.02  | -0.01  | 0.06  |      |
| <b>Age at diagnosis</b>                        | 0.003  | -0.001 | 0.01  | 0.09  | 0.002 | -0.002 | 0.005 | 0.33 |
| <b>Diagnostic period</b>                       | -0.001 | -0.004 | 0.002 | 0.50  | 0.002 | -0.001 | 0.005 | 0.18 |
| <b>Laterality defects (Ref: Situs solitus)</b> |        |        |       | 0.99  |       |        |       | 0.87 |
| Situs Ambiguous                                | 0.01   | -0.08  | 0.09  |       | 0.003 | -0.09  | 0.09  |      |
| Situs Inversus                                 | -0.004 | -0.04  | 0.03  |       | 0.02  | -0.02  | 0.05  |      |
| Situs Unknown                                  | -0.01  | -0.08  | 0.06  |       | 0.01  | -0.07  | 0.08  |      |
| <b>Ultrastructural defects (Ref: ODA)</b>      |        |        |       | 0.04  |       |        |       | 0.18 |
| Central Complex defect                         | 0.03   | -0.02  | 0.07  |       | 0.05  | -0.001 | 0.10  |      |
| ODA/IDA                                        | -0.05  | -0.09  | -0.01 |       | -0.01 | -0.05  | 0.04  |      |
| Microtubular disorganisation                   | 0.01   | -0.05  | 0.08  |       | 0.06  | -0.01  | 0.12  |      |
| Non-diagnostic                                 | -0.01  | -0.06  | 0.05  |       | -0.02 | -0.08  | 0.04  |      |
| <b>BMI</b>                                     | 0.01   | 0.004  | 0.03  | <0.01 | 0.01  | 0.00   | 0.02  | 0.04 |

<sup>¶</sup> Likelihood ratio test p-value indicating whether the characteristic explains differences in FEV<sub>1</sub> or FVC within the study population.

Adjusted for all variables of the full model, the full summary output is in the online supplement (Table S1).

+ The Intercept describes the FEV<sub>1</sub> and FVC of a reference patient 6 years, who is male, from Germany, with a BMI z-score of 0, diagnosed at birth (age = 0) in 1978, with a definite PCD diagnosis. Categorical variables describe the change from the reference category, while continuous variables describe the change from the reference patient for each unit of increase. Change of lung function over time describes the change in the trajectory of FEV<sub>1</sub> and FVC per year increase, based on the reference category for categorical variables and for each unit of increase for continuous variables.

FEV<sub>1</sub>: Forced expiratory volume in 1 second; FVC: Forced vital capacity; ODA: outer dynein arm; IDA: inner dynein arm; BMI: body mass index

**Table S4.** FEV<sub>1</sub> of patients with primary ciliary dyskinesia (PCD) from the international PCD cohort compared to Global Lung Function Initiative 2012 reference values (linear mixed effects regression, adjusting for all covariates) for single countries with more than 30 patients

| N: measurements, individuals                   | Denmark<br>1459, 59 |        |       | France<br>340, 38 |        |       | Germany<br>664, 60 |        |       | Israel<br>239, 41 |        |       |
|------------------------------------------------|---------------------|--------|-------|-------------------|--------|-------|--------------------|--------|-------|-------------------|--------|-------|
|                                                | Estimate            | 95% CI | p-val | estimate          | 95% CI | p-val | Estimate           | 95% CI | p-val | Estimate          | 95% CI | p-val |
| Intercept                                      | 0.26                | -1.18  | 1.71  | -0.98             | -2.12  | 0.17  | -6.91              | -11.43 | -2.39 | 88.5              | -41.6  | 218   |
| <b>Sex</b> (Ref: male)                         |                     |        | 0.28  |                   |        | 0.11  |                    |        | 0.38  |                   |        | <0.01 |
| Female                                         | -0.28               | -1.03  | 0.48  | -0.73             | -1.40  | -0.06 | 0.56               | -0.23  | 1.35  | -0.65             | -1.94  | 0.64  |
| <b>Age at diagnosis</b>                        | -0.10               | -0.19  | 0.02  | 0.04              | -0.01  | -0.10 | 0.08               | 0.69   | -0.18 | -0.30             | -0.06  | 0.02  |
| <b>Diagnostic period</b>                       | 0.01                | -0.05  | 0.07  | 0.85              | 0.01   | -0.05 | 0.07               | 0.04   | 0.023 | -0.07             | 0.39   | 0.02  |
| <b>Diagnostic certainty</b> (Ref: definite)    |                     |        | 0.23  |                   |        | 0.70  |                    |        | 0.46  |                   |        | 0.02  |
| Probable PCD                                   | -0.08               | -0.86  | 0.70  | -                 | -      | -     | -0.49              | -1.40  | 0.42  | 1.91              | 0.29   | 3.54  |
| Clinical diagnosis                             | -0.24               | -2.62  | 2.13  | 0.29              | -0.60  | 1.17  | -1.47              | -3.25  | 0.31  | 0.63              | -0.93  | 2.19  |
| <b>Laterality defects</b> (Ref: situs solitus) |                     |        | 0.34  |                   |        | 0.11  |                    |        | 0.06  |                   |        | 0.02  |
| Situs Ambiguous                                | -                   | -      | -     | -                 | -      | -     | 2.08               | -0.99  | 5.14  | -                 | -      | -     |
| Situs Inversus                                 | -0.80               | -1.62  | 0.02  | 1.11              | 0.19   | 2.04  | 1.26               | 0.31   | 2.21  | 0.90              | -0.59  | 2.40  |
| Situs Unknown                                  | -0.09               | -2.78  | 2.60  | 0.53              | -0.21  | 1.27  | -                  | -      | -     | -2.93             | -5.27  | -0.59 |
| <b>BMI</b>                                     | 0.48                | 0.38   | 0.57  | <0.01             | 0.15   | 0.00  | 0.29               | 0.02   | 0.42  | 0.31              | 0.53   | <0.01 |
| <b>Change in FEV1 over time</b>                |                     |        |       |                   |        |       |                    |        |       |                   |        |       |
| <b>Sex</b> (Ref: male)                         |                     |        | 0.28  |                   |        | 0.64  |                    |        | 0.54  |                   |        | 0.39  |
| Female                                         | -0.3                | -0.09  | 0.03  | 0.02              | -0.07  | 0.11  | -0.03              | -0.11  | 0.06  | -0.07             | -0.21  | 0.08  |
| <b>Age at diagnosis</b>                        | 0.01                | 0.002  | 0.01  | 0.02              | -0.003 | -0.01 | 0.01               | 0.56   | 0.02  | 0.002             | 0.03   | 0.04  |
| <b>Diagnostic period</b>                       | -0.001              | -0.01  | 0.004 | 0.57              | 0.01   | 0.001 | 0.02               | 0.04   | -0.01 | -0.03             | 0.01   | 0.27  |
| <b>Diagnostic certainty</b> (Ref: definite)    |                     |        | 0.16  |                   |        | 0.89  |                    |        | 0.51  |                   |        | 0.06  |
| Probable PCD                                   | -0.06               | -0.13  | 0.003 | -                 | -      | -     | 0.06               | -0.04  | 0.16  | -0.21             | -0.39  | -0.03 |
| Clinical diagnosis                             | -0.08               | -0.31  | 0.16  | 0.01              | -0.15  | 0.17  | 0.05               | -0.13  | 0.22  | 0.04              | -0.17  | 0.25  |
| <b>Laterality defects</b> (Ref: situs solitus) |                     |        | 0.58  |                   |        | 0.69  |                    |        | 0.53  |                   |        | 0.09  |
| Situs Ambiguous                                | -                   | -      | -     | -                 | -      | -     | -0.13              | -0.43  | 0.17  | -                 | -      | -     |
| Situs Inversus                                 | 0.02                | -0.05  | 0.09  | 0.02              | -0.10  | 0.13  | -0.04              | -0.13  | 0.06  | -0.12             | -0.29  | 0.04  |
| Situs Unknown                                  | -0.08               | -0.27  | 0.11  | -0.03             | -0.12  | 0.06  | -                  | -      | -     | 0.18              | -0.07  | 0.43  |
| <b>BMI</b>                                     | 0.004               | -0.02  | 0.03  | 0.72              | 0.03   | 0.001 | 0.06               | 0.05   | 0.03  | 0.002             | 0.05   | 0.05  |

Models adjusted for age at measurement as a linear term and age at measurement as quadratic term

| N: measurements, individuals | Italy<br>163, 32 |        |       | Netherlands<br>114, 38 |        |       | Turkey<br>329, 49 |        |       | UK<br>167, 37 |        |       |
|------------------------------|------------------|--------|-------|------------------------|--------|-------|-------------------|--------|-------|---------------|--------|-------|
|                              | Estimate         | 95% CI | p-val | estimate               | 95% CI | p-val | Estimate          | 95% CI | p-val | Estimate      | 95% CI | p-val |
| Intercept                    | 0.28             | -1.98  | 2.53  | -8.26                  | -20.7  | 4.13  | -6.13             | -13.37 | 1.11  | 4.18          | -0.52  | 8.88  |

|                                                 |       |       |      |       |       |        |        |      |        |       |      |       |       |        |       |       |
|-------------------------------------------------|-------|-------|------|-------|-------|--------|--------|------|--------|-------|------|-------|-------|--------|-------|-------|
| <b>Sex</b> (Ref: male)                          |       |       |      | 0.58  |       |        |        | 0.04 |        |       |      | 0.60  |       |        |       | 0.81  |
| Female                                          | -0.30 | -1.56 | 0.96 |       | 2.01  | 0.57   | 3.45   |      | 0.60   | -0.54 | 1.74 |       | -0.46 | -1.94  | 1.01  |       |
| <b>Age at diagnosis</b>                         | -0.08 | -0.20 | 0.04 | 0.15  | -0.22 | -0.70  | 0.26   | 0.02 | -0.20  | -0.41 | 0.02 | <0.01 | 0.36  | 0.20   | 0.52  | <0.01 |
| <b>Diagnostic period</b>                        | -0.06 | -0.15 | 0.02 | 0.23  | 0.28  | -0.19  | 0.75   | 0.05 | 0.14   | -0.10 | 0.38 | 0.04  | -0.23 | -0.38  | -0.08 | 0.01  |
| <b>Diagnostic certainty</b> (Ref: definite PCD) |       |       |      | <0.01 |       |        |        | 0.53 |        |       |      | 0.21  |       |        |       | 0.06  |
| Probable PCD                                    | 0.27  | -2.38 | 2.91 |       | 0.18  | -1.46  | 1.83   |      | -0.17  | -1.71 | 1.38 |       | 0.74  | -3.94  | 5.42  |       |
| Clinical diagnosis                              | -1.85 | -4.78 | 1.09 |       | 1.55  | -7.47  | 10.57  |      | 1.07   | -0.58 | 2.73 |       | 7.64  | 2.36   | 12.92 |       |
| <b>Laterality defects</b> (Ref: situs solitus)  |       |       |      | 0.43  |       |        |        | 0.12 |        |       |      | 0.62  |       |        |       | 0.04  |
| Situs Ambiguous                                 | -     | -     | -    |       | -0.09 | -3.49  | 3.32   |      | -      | -     | -    |       | 4.88  | 0.05   | 9.70  |       |
| Situs Inversus                                  | 0.84  | -0.81 | 2.50 |       | 2.75  | 0.72   | 4.78   |      | 0.37   | -0.67 | 1.41 |       | 0.68  | -0.72  | 2.08  |       |
| Situs Unknown                                   | -     | -     | -    |       | 6.78  | -5.70  | 19.2   |      | -      | -     | -    |       | -4.34 | -10.16 | 1.46  |       |
| <b>BMI</b> (continuous)                         | 0.33  | 0.16  | 0.49 | <0.01 | 0.32  | 0.01   | 0.64   | 0.05 | 0.28   | 0.12  | 0.44 | <0.01 | 0.15  | -0.12  | 0.43  | <0.01 |
| <b>Change in FEV1 over time</b>                 |       |       |      |       |       |        |        |      |        |       |      |       |       |        |       |       |
| <b>Sex</b> (Ref: male)                          |       |       |      | 0.31  |       |        |        | 0.04 |        |       |      | 0.40  |       |        |       | 0.52  |
| Female                                          | 0.05  | -0.04 | 0.15 |       | -0.18 | -0.34  | -0.02  |      | -0.05  | -0.17 | 0.07 |       | 0.04  | -0.07  | 0.14  |       |
| <b>Age at diagnosis</b>                         | 0.01  | 0.001 | 0.02 | 0.06  | 0.06  | -0.001 | 0.11   | 0.05 | 0.002  | -0.03 | 0.03 | 0.91  | -0.03 | -0.05  | -0.02 | <0.01 |
| <b>Diagnostic period</b>                        | 0.001 | -0.01 | 0.01 | 0.92  | -0.06 | -0.13  | -0.001 | 0.05 | -0.001 | -0.03 | 0.03 | 0.99  | 0.02  | 0.01   | 0.04  | <0.01 |
| <b>Diagnostic certainty</b> (Ref: definite)     |       |       |      | <0.01 |       |        |        |      |        |       |      | 0.12  |       |        |       | 0.03  |
| Probable PCD                                    | 0.33  | 0.10  | 0.56 |       | 0.03  | -0.20  | 0.25   | 0.97 | 0.09   | -0.07 | 0.25 |       | -0.03 | -0.39  | 0.34  |       |
| Clinical diagnosis                              | 0.66  | 0.30  | 1.01 |       | 0.03  | -0.91  | 0.98   |      | -0.10  | -0.30 | 0.10 |       | -0.44 | -0.78  | -0.09 |       |
| <b>Laterality defects</b> (Ref: situs solitus)  |       |       |      | 0.19  |       |        |        | 0.23 |        |       |      | 0.83  |       |        |       | 0.36  |
| Situs Ambiguous                                 | -     | -     | -    |       | 0.03  | -0.38  | 0.44   |      | -      | -     | -    |       | -0.18 | -0.48  | 0.11  |       |
| Situs Inversus                                  | -0.09 | -0.22 | 0.04 |       | -0.23 | -0.49  | 0.04   |      | -0.01  | -0.13 | 0.10 |       | 0.04  | -0.07  | 0.14  |       |
| Situs Unknown                                   | -     | -     | -    |       | -0.86 | -2.19  | 0.47   |      | -      | -     | -    |       | 0.24  | -0.26  | 0.74  |       |
| <b>BMI</b>                                      | 0.04  | 0.02  | 0.06 | <0.01 | 0.01  | -0.04  | 0.06   | 0.69 | 0.03   | 0.01  | 0.06 | 0.01  | 0.05  | 0.02   | 0.08  | <0.01 |

Models adjusted for age at measurement as a linear term and age at measurement as quadratic term

**Table S5** FEV<sub>1</sub> and FVC in patients with primary ciliary dyskinesia (PCD) from the international PCD cohort with available microbiological information compared to Global Lung Function Initiative 2012 reference values.

| Characteristic                              | FEV1     |        |      |                      | FVC      |        |      |                      |
|---------------------------------------------|----------|--------|------|----------------------|----------|--------|------|----------------------|
|                                             | Estimate | 95% CI |      | p-value <sup>¶</sup> | Estimate | 95% CI |      | p-value <sup>¶</sup> |
| <b>Microbiology</b>                         |          |        |      |                      |          |        |      |                      |
| Any isolated pathogen                       | 0.05     | -0.26  | 0.36 | 0.07                 | -0.23    | -0.58  | 0.13 | 0.01                 |
| Haemophilus influenzae                      | -0.15    | -0.43  | 0.12 | 0.39                 | -0.28    | -0.59  | 0.03 | 0.09                 |
| Moraxella catarrhalis                       | 0.04     | -0.38  | 0.47 | 0.55                 | 0.17     | -0.31  | 0.65 | 0.50                 |
| Pseudomonas aeruginosa                      | 0.37     | -0.22  | 0.96 | 0.39                 | 0.43     | -0.23  | 1.10 | 0.11                 |
| Streptococcus pneumoniae                    | -0.11    | -0.45  | 0.23 | 0.96                 | -0.11    | -0.50  | 0.28 | 0.67                 |
| Staphylococcus aureus                       | 0.03     | -0.37  | 0.42 | 0.28                 | -0.04    | -0.50  | 0.41 | 0.48                 |
| <b>Interactions with age at measurement</b> |          |        |      |                      |          |        |      |                      |
| Any isolated pathogen                       | -0.01    | -0.03  | 0.01 | 0.38                 | 0.01     | -0.02  | 0.03 | 0.62                 |
| Haemophilus influenzae                      | 0.01     | -0.01  | 0.03 | 0.38                 | 0.01     | -0.01  | 0.04 | 0.19                 |
| Moraxella catarrhalis                       | 0.0001   | -0.03  | 0.03 | 1.00                 | -0.01    | -0.04  | 0.03 | 0.62                 |
| Pseudomonas aeruginosa                      | -0.02    | -0.06  | 0.02 | 0.29                 | -0.02    | -0.07  | 0.02 | 0.37                 |
| Streptococcus pneumoniae                    | 0.01     | -0.02  | 0.03 | 1.00                 | 0.01     | -0.02  | 0.04 | 0.46                 |
| Staphylococcus aureus                       | 0.003    | -0.02  | 0.03 | 0.82                 | 0.01     | -0.02  | 0.04 | 0.65                 |

<sup>¶</sup> Likelihood ratio test p-value indicating whether the characteristic explains differences in FEV<sub>1</sub> or FVC within the study population.

**Table S6.** Sensitivity analysis: FEV<sub>1</sub> of patients with primary ciliary dyskinesia (PCD) from the international PCD cohort compared to Global Lung Function Initiative 2012 reference values (linear mixed effects regression, adjusting for all covariates) excluding patients diagnosed the same year as first lung function measurement (n=356).

| Variable                                                                             | Estimate | FEV <sub>1</sub><br>95% CI |       | p-value <sup>¶</sup> |
|--------------------------------------------------------------------------------------|----------|----------------------------|-------|----------------------|
| <b>Intercept (Lung function at age 6 years for “reference patient”) <sup>+</sup></b> | -1.10    | -2.11                      | -0.09 |                      |
| <b>Age at measurement</b>                                                            | -0.04    | -0.13                      | 0.05  |                      |
| <b>Country (Ref: Germany)</b>                                                        |          |                            |       | <0.01                |
| Australia                                                                            | -0.26    | -1.30                      | 0.77  |                      |
| Belgium                                                                              | -0.24    | -1.09                      | 0.61  |                      |
| Cyprus                                                                               | -1.05    | -2.22                      | 0.11  |                      |
| Czech Republic                                                                       | -1.16    | -1.93                      | -0.40 |                      |
| Denmark                                                                              | 0.22     | -0.44                      | 0.87  |                      |
| France                                                                               | -0.001   | -0.84                      | 0.84  |                      |
| Greece                                                                               | 1.69     | -1.93                      | 5.30  |                      |
| Israel                                                                               | 0.01     | -0.87                      | 0.89  |                      |
| Italy                                                                                | -0.19    | -0.95                      | 0.58  |                      |
| Netherlands                                                                          | 1.67     | 0.84                       | 2.51  |                      |
| Norway                                                                               | -0.40    | -1.37                      | 0.57  |                      |
| Poland                                                                               | -1.15    | -2.04                      | -0.26 |                      |
| Switzerland                                                                          | -0.01    | -0.80                      | 0.78  |                      |
| Turkey                                                                               | -1.76    | -2.48                      | -1.04 |                      |
| UK                                                                                   | -1.24    | -2.11                      | -0.36 |                      |
| <b>Sex (Ref: male)</b>                                                               |          |                            |       | 0.28                 |
| Female                                                                               | 0.03     | -0.28                      | 0.34  |                      |
| <b>Age at diagnosis</b>                                                              | -0.03    | -0.06                      | 0.01  | 0.14                 |
| <b>Diagnostic period</b>                                                             | 0.02     | -0.01                      | 0.05  | 0.43                 |
| <b>Diagnostic certainty (Ref: definite PCD diagnosis)</b>                            |          |                            |       | 0.51                 |
| Probable PCD diagnosis                                                               | -0.05    | -0.46                      | 0.36  |                      |
| Clinical diagnosis only                                                              | 0.43     | -0.24                      | 1.10  |                      |
| <b>Laterality defects (Ref: situs solitus)</b>                                       |          |                            |       | 0.73                 |
| Situs Ambiguous                                                                      | 0.49     | -0.50                      | 1.48  |                      |
| Situs Inversus                                                                       | 0.30     | -0.06                      | 0.66  |                      |
| Situs Unknown                                                                        | 0.12     | -0.62                      | 0.86  |                      |
| <b>BMI</b>                                                                           | 0.33     | 0.28                       | 0.37  | <0.01                |
| <b>Change of lung function over time <sup>#</sup></b>                                |          |                            |       |                      |
| <b>Country (Ref: Germany)</b>                                                        |          |                            |       | <0.01                |
| Australia                                                                            | -0.03    | -0.12                      | 0.06  |                      |
| Belgium                                                                              | 0.02     | -0.06                      | 0.10  |                      |
| Cyprus                                                                               | 0.06     | -0.04                      | 0.16  |                      |
| Czech Republic                                                                       | 0.05     | -0.02                      | 0.13  |                      |
| Denmark                                                                              | -0.01    | -0.07                      | 0.05  |                      |
| France                                                                               | -0.03    | -0.11                      | 0.04  |                      |
| Greece                                                                               | -0.06    | -0.39                      | 0.28  |                      |
| Israel                                                                               | -0.04    | -0.13                      | 0.04  |                      |
| Italy                                                                                | -0.04    | -0.11                      | 0.04  |                      |
| Netherlands                                                                          | -0.16    | -0.27                      | -0.05 |                      |
| Norway                                                                               | 0.001    | -0.11                      | 0.11  |                      |
| Poland                                                                               | 0.07     | -0.03                      | 0.17  |                      |
| Switzerland                                                                          | -0.01    | -0.09                      | 0.06  |                      |
| Turkey                                                                               | 0.11     | 0.04                       | 0.18  |                      |
| UK                                                                                   | 0.04     | -0.05                      | 0.12  |                      |
| <b>Sex (Ref: male)</b>                                                               |          |                            |       | 0.20                 |
| Female                                                                               | -0.02    | -0.05                      | 0.01  |                      |
| <b>Age at diagnosis</b>                                                              | 0.003    | 0.001                      | 0.01  | 0.05                 |

|                                                           |        |        |       |       |
|-----------------------------------------------------------|--------|--------|-------|-------|
| <b>Diagnostic period</b>                                  | -0.001 | -0.004 | 0.001 | 0.33  |
| <b>Diagnostic certainty</b> (Ref: definite PCD diagnosis) |        |        |       | 0.99  |
| Probable PCD diagnosis                                    | -0.002 | -0.04  | 0.04  |       |
| Clinical diagnosis only                                   | -0.003 | -0.07  | 0.07  |       |
| <b>Laterality defects</b> (Ref: situs solitus)            |        |        |       | 0.64  |
| Situs Ambiguous                                           | -0.02  | -0.12  | 0.08  |       |
| Situs Inversus                                            | -0.02  | -0.06  | 0.01  |       |
| Situs Unknown                                             | -0.01  | -0.08  | 0.06  |       |
| <b>BMI</b>                                                | 0.01   | 0.01   | 0.02  | <0.01 |

FEV<sub>1</sub>: Forced expiratory volume in 1 second; BMI: body mass index ¶ Likelihood ratio test p-value indicating whether the characteristic explains differences in FEV<sub>1</sub> within the study population. <sup>†</sup>The Intercept describes the FEV<sub>1</sub> of a reference patient at 6 years, who is male, from Germany, with a BMI z-score of 0, diagnosed at birth (age = 0) in 1978, with a definite PCD diagnosis. Categorical variables describe the change from the reference category, while continuous variables describe the change from the reference patient for each unit of increase. \* Defined as hallmark PCD ultrastructural defect identified by electron microscopy findings or biallelic PCD causing gene mutation based on the ERS PCD diagnosis guidelines [14]. # Abnormal light or high frequency video microscopy finding and/or low ( $\leq 77$ nl/min) nasal NO value. <sup>#</sup>Change in lung function over time are based on interaction terms between the characteristics (e.g. country, sex) and age. Change of lung function over time thus describes the change in the trajectory of FEV<sub>1</sub> per year increase, based on the reference category for categorical variables and for each unit of increase for continuous variables.
